# Supplementary material for: A decision support system for primary headache developed through machine learning
Source: PeerJ. 2022 Jan 11;10:e12743. doi: 10.7717/peerj.12743 (PMC8759354; doi:10.7717/peerj.12743)
Supplement: Supplemental Information 1 [file peerj-10-12743-s001.xlsx]

## Sheet: head
id	diagnose	age	sex	job	height	weight	course	frequency	duration	throbbing	stabbing pain	compression pain	dull pain	schizophrenia headache	others	location	frontal	occiput	tempus	orbit	the severe intensity	no symptoms	spark in front of your eyes	a short period of visual disturbance	paresthesia on one side of the hands, feet or face	difficulty speaking	no symptoms	autonomic symptoms such as eye watering, nasal congestion and swelling around the eye	nausea/vomiting	photophobia/phonophobia	others	banlance disorders, abnormal gait and posture	vertigo, ringing in ears	diarrhea, loss of appetite	epileptic seizure	neck pain	others	changes after activities	none	lack of sleep	too much sleep	related to the menstrual cycle	drinking alcohol or eating sweets	mental stress	coughing,exerting force,ect	external cold stimulation	sexual activities	the alleviative way when headache attacks	in the past 3 months, the headache days
1	migraine	29	female	staff	168	75	years	Once in a few years	days	NO	NO	NO	NO	NO	NO	Alternate front and back	NO	YES	NO	NO	medium	YES	NO	NO	NO	NO	NO	NO	YES	NO	NO	NO	NO	NO	NO	NO	NO	aggravate	NO	YES	NO	NO	NO	NO	NO	NO	NO	rest	15-30 days
2	migraine	38	female	unemployed	163	66	years	Once in a few weeks	days	NO	NO	YES	NO	NO	NO	One side	NO	NO	YES	NO	heavy	YES	NO	NO	NO	NO	NO	NO	YES	YES	NO	NO	NO	NO	NO	NO	NO	aggravate	NO	YES	YES	NO	NO	YES	NO	NO	NO	drug	Less than 15 days
3	migraine	27	female	student	165	55	years	Once in a few months	days	NO	NO	YES	NO	NO	NO	Alternate left and right	YES	NO	NO	NO	medium	NO	NO	YES	NO	NO	NO	NO	NO	YES	NO	NO	YES	NO	NO	NO	NO	unchanged	NO	YES	NO	NO	NO	NO	NO	NO	NO	drug	Less than 15 days
4	migraine	47	female	worker	160	56	years	Once in a few months	hours	NO	YES	NO	NO	NO	NO	One side	NO	NO	YES	NO	medium	YES	NO	NO	NO	NO	NO	NO	YES	YES	NO	NO	NO	NO	NO	NO	NO	aggravate	YES	NO	NO	NO	NO	NO	NO	NO	NO	rest	Less than 15 days
5	migraine	55	female	farmer	161	57	years	Once in a few weeks	hours	NO	NO	NO	YES	NO	NO	One side	NO	NO	NO	YES	medium	NO	YES	NO	NO	NO	NO	NO	NO	YES	NO	NO	NO	NO	NO	NO	NO	aggravate	YES	NO	NO	NO	NO	NO	NO	NO	NO	drug	Less than 15 days
6	migraine	62	female	others	155	45	years	Once in a few weeks	days	NO	NO	YES	NO	NO	NO	Full head	NO	NO	YES	NO	heavy	YES	NO	NO	NO	NO	NO	NO	YES	YES	NO	NO	YES	YES	NO	YES	NO	unchanged	NO	YES	NO	NO	NO	YES	NO	YES	NO	drug	30-60 days
7	migraine	45	female	worker	160	62	years	Once in a few years	days	NO	NO	YES	NO	NO	NO	Full head	YES	NO	YES	NO	light	YES	NO	NO	NO	NO	NO	NO	YES	NO	NO	NO	NO	NO	NO	NO	NO	aggravate	NO	YES	NO	NO	NO	YES	NO	NO	NO	rest	Less than 15 days
8	migraine	46	female	staff	155	45	years	Once in a few weeks	minutes	NO	NO	YES	NO	YES	NO	Alternate front and back	YES	YES	NO	YES	light	YES	NO	NO	NO	NO	NO	YES	YES	YES	NO	NO	YES	NO	YES	YES	NO	aggravate	NO	YES	NO	NO	NO	YES	NO	YES	NO	drug	Less than 15 days
9	migraine	36	female	staff	160	75	years	Once in a few months	days	NO	YES	YES	YES	NO	NO	Full head	YES	YES	YES	NO	medium	YES	NO	NO	NO	NO	NO	NO	YES	YES	NO	NO	NO	NO	NO	YES	NO	aggravate	NO	YES	YES	YES	YES	YES	YES	YES	NO	rest	30-60 days
10	migraine	63	male	others	172	76	years	Once in a few days	minutes	NO	YES	NO	NO	NO	NO	Full head	NO	NO	YES	YES	medium	YES	NO	NO	NO	NO	YES	NO	NO	NO	NO	NO	NO	NO	NO	YES	NO	unchanged	NO	NO	NO	NO	YES	NO	NO	NO	NO	persistence	60-90 days
11	migraine	29	female	unemployed	156	60	years	Once in a few days	days	NO	NO	NO	YES	NO	NO	One side	YES	YES	NO	YES	medium	NO	NO	NO	YES	NO	NO	NO	YES	NO	NO	YES	NO	NO	NO	YES	NO	unchanged	NO	YES	NO	NO	NO	YES	NO	NO	YES	rest	Less than 15 days
12	migraine	53	female	worker	160	53	years	Once in a few months	days	NO	NO	NO	NO	NO	NO	One side	YES	YES	NO	NO	heavy	YES	NO	NO	NO	NO	NO	NO	YES	NO	NO	NO	NO	NO	NO	YES	NO	unchanged	NO	YES	NO	NO	NO	NO	NO	NO	NO	rest	15-30 days
13	migraine	53	female	farmer	162	65	months	Once in a few days	hours	NO	NO	YES	NO	NO	NO	One side	YES	NO	NO	NO	medium	NO	NO	NO	NO	YES	NO	YES	NO	NO	NO	NO	NO	NO	NO	YES	NO	aggravate	NO	NO	YES	NO	NO	NO	NO	NO	NO	drug	60-90 days
14	migraine	61	male	others	171	75	years	Once in a few months	days	NO	NO	NO	NO	NO	NO	Alternate left and right	NO	NO	YES	YES	medium	YES	NO	NO	NO	NO	NO	NO	YES	YES	NO	NO	NO	NO	NO	YES	NO	unchanged	NO	YES	NO	NO	YES	NO	NO	YES	NO	drug	Less than 15 days
15	migraine	47	female	staff	158	53	years	Once in a few months	hours	NO	NO	YES	NO	NO	NO	Alternate front and back	NO	NO	YES	NO	heavy	YES	NO	NO	NO	NO	NO	NO	NO	YES	NO	NO	NO	NO	NO	NO	NO	aggravate	NO	YES	NO	NO	NO	YES	NO	NO	NO	drug	Less than 15 days
16	migraine	53	male	others	170	62	years	Once in a few days	hours	NO	NO	NO	NO	NO	NO	One side	YES	NO	NO	NO	heavy	NO	NO	NO	YES	NO	NO	YES	NO	NO	NO	NO	NO	NO	YES	NO	NO	aggravate	YES	NO	NO	NO	NO	NO	NO	NO	NO	rest	60-90 days
17	migraine	44	female	farmer	168	68	years	Once in a few months	days	NO	NO	NO	NO	NO	NO	Full head	YES	NO	NO	NO	medium	YES	NO	NO	NO	NO	NO	NO	YES	NO	NO	NO	NO	NO	NO	NO	NO	aggravate	NO	YES	NO	YES	NO	NO	NO	NO	NO	drug	Less than 15 days
18	migraine	65	female	worker	158	65	months	Once in a few weeks	minutes	NO	NO	NO	NO	NO	NO	One side	NO	NO	NO	YES	heavy	NO	NO	NO	YES	NO	NO	NO	YES	NO	NO	NO	NO	NO	NO	NO	NO	aggravate	NO	YES	NO	NO	NO	YES	NO	NO	NO	rest	60-90 days
19	migraine	54	female	farmer	160	68	years	Once in a few days	days	NO	YES	NO	NO	NO	NO	Full head	NO	NO	YES	NO	medium	YES	NO	NO	NO	NO	NO	NO	YES	NO	NO	YES	NO	NO	NO	NO	NO	aggravate	YES	NO	NO	NO	NO	NO	NO	NO	NO	drug	60-90 days
20	migraine	44	female	staff	160	45	years	Once in a few days	hours	NO	NO	NO	YES	NO	NO	One side	NO	NO	YES	NO	medium	YES	NO	NO	NO	NO	NO	NO	YES	NO	NO	NO	YES	NO	NO	NO	NO	unchanged	NO	YES	NO	NO	NO	NO	NO	NO	NO	drug	60-90 days
21	migraine	53	female	staff	163	55	years	Once in a few months	days	NO	YES	NO	YES	NO	NO	Full head	YES	NO	NO	NO	heavy	YES	NO	NO	NO	NO	NO	NO	YES	NO	NO	NO	NO	YES	NO	YES	NO	aggravate	NO	NO	NO	YES	NO	YES	NO	NO	NO	drug	Less than 15 days
22	migraine	64	female	worker	160	60	months	Once in a few days	hours	NO	NO	NO	NO	NO	NO	One side	NO	YES	NO	NO	heavy	NO	NO	YES	NO	NO	NO	NO	YES	NO	NO	NO	NO	YES	NO	NO	NO	unchanged	YES	NO	NO	NO	NO	NO	NO	NO	NO	persistence	Less than 15 days
23	migraine	37	female	staff	155	42	years	Once in a few years	days	YES	NO	YES	NO	NO	NO	Both sides	NO	NO	YES	YES	medium	YES	NO	NO	NO	NO	NO	YES	YES	YES	NO	NO	YES	NO	NO	NO	NO	unchanged	NO	YES	NO	YES	NO	YES	NO	NO	NO	drug	Less than 15 days
24	migraine	21	female	student	147	40	years	Once in a few days	hours	NO	NO	NO	NO	NO	NO	Both sides	YES	NO	NO	NO	heavy	YES	NO	NO	NO	NO	NO	NO	YES	NO	NO	NO	NO	NO	NO	NO	NO	relieve	YES	NO	NO	NO	NO	NO	NO	NO	NO	rest	Less than 15 days
25	migraine	46	female	staff	165	67	months	Once in a few weeks	days	NO	NO	NO	YES	NO	NO	One side	YES	NO	NO	NO	light	YES	NO	NO	NO	NO	NO	NO	YES	NO	NO	NO	NO	NO	NO	NO	NO	unchanged	NO	YES	NO	YES	NO	NO	NO	NO	NO	rest	Less than 15 days
26	migraine	45	female	others	162	65	years	Once in a few weeks	hours	NO	NO	NO	NO	NO	NO	Both sides	NO	NO	YES	NO	light	YES	NO	NO	NO	NO	NO	NO	YES	YES	NO	NO	NO	NO	NO	NO	NO	unchanged	NO	NO	NO	NO	NO	NO	NO	YES	NO	persistence	Less than 15 days
27	migraine	40	female	unemployed	165	60	years	Once in a few days	hours	NO	NO	NO	NO	NO	NO	Full head	YES	YES	YES	YES	heavy	NO	NO	NO	YES	NO	NO	NO	NO	YES	NO	YES	NO	NO	NO	NO	NO	aggravate	NO	YES	NO	NO	NO	YES	YES	NO	NO	drug	60-90 days
28	migraine	48	female	staff	160	62	months	Once in a few days	days	NO	NO	NO	NO	NO	NO	Both sides	NO	NO	YES	NO	light	YES	NO	NO	NO	NO	YES	NO	NO	NO	NO	NO	YES	NO	NO	NO	NO	unchanged	YES	NO	NO	NO	NO	NO	NO	NO	NO	drug	15-30 days
29	migraine	64	male	others	166	70	years	Once in a few years	minutes	NO	NO	NO	NO	NO	NO	One side	NO	NO	YES	NO	medium	NO	YES	NO	NO	NO	YES	NO	NO	NO	NO	NO	NO	NO	NO	NO	NO	unchanged	YES	NO	NO	NO	NO	NO	NO	NO	NO	drug	Less than 15 days
30	migraine	68	female	others	160	61	years	Once in a few weeks	days	NO	NO	NO	NO	NO	NO	Both sides	NO	NO	YES	NO	medium	NO	YES	NO	NO	NO	YES	NO	NO	NO	NO	NO	YES	NO	NO	NO	NO	aggravate	NO	YES	NO	NO	NO	NO	NO	NO	NO	drug	Less than 15 days
31	migraine	71	female	others	166	65	years	Once in a few days	hours	NO	NO	NO	NO	NO	NO	Both sides	YES	NO	NO	NO	medium	YES	NO	NO	NO	NO	YES	NO	NO	NO	NO	NO	NO	NO	NO	NO	NO	unchanged	YES	NO	NO	NO	NO	NO	NO	NO	NO	rest	Less than 15 days
32	migraine	62	female	worker	158	53	months	Once in a few weeks	days	NO	NO	NO	NO	NO	NO	One side	YES	NO	NO	NO	heavy	YES	NO	NO	NO	NO	YES	NO	NO	NO	NO	NO	NO	NO	NO	NO	NO	unchanged	YES	NO	NO	NO	NO	NO	NO	NO	NO	rest	15-30 days
33	migraine	29	female	staff	160	65	years	Once in a few months	days	NO	NO	NO	YES	NO	NO	Alternate left and right	NO	NO	YES	YES	medium	YES	NO	NO	NO	NO	NO	YES	YES	YES	NO	NO	NO	NO	NO	NO	NO	aggravate	YES	NO	NO	NO	NO	NO	NO	NO	NO	drug	15-30 days
34	migraine	74	female	unemployed	160	54	years	Once in a few months	minutes	NO	NO	YES	NO	NO	NO	Alternate front and back	YES	NO	NO	NO	medium	NO	YES	NO	NO	NO	NO	NO	YES	NO	NO	YES	YES	NO	NO	NO	NO	unchanged	YES	NO	NO	NO	NO	NO	NO	NO	NO	else	Less than 15 days
35	migraine	70	female	unemployed	156	56	years	Once in a few months	days	NO	NO	YES	NO	NO	NO	One side	NO	NO	YES	NO	medium	NO	YES	NO	NO	YES	NO	NO	YES	NO	NO	YES	YES	NO	NO	NO	NO	unchanged	NO	NO	NO	NO	NO	NO	YES	NO	NO	drug	Less than 15 days
36	migraine	78	male	unemployed	165	63	years	Once in a few months	minutes	YES	NO	NO	NO	NO	NO	Alternate front and back	YES	NO	NO	NO	medium	YES	NO	NO	NO	NO	NO	YES	NO	NO	NO	YES	NO	NO	NO	YES	NO	unchanged	NO	YES	NO	NO	NO	NO	YES	NO	NO	else	Less than 15 days
37	migraine	63	female	unemployed	156	48	years	Once in a few months	hours	NO	NO	NO	NO	NO	NO	Alternate front and back	YES	NO	NO	NO	medium	NO	YES	YES	NO	NO	YES	NO	NO	NO	NO	NO	YES	NO	NO	NO	NO	unchanged	NO	NO	NO	NO	NO	NO	YES	NO	NO	rest	Less than 15 days
38	migraine	52	female	worker	155	55	months	Once in a few months	hours	NO	YES	NO	NO	NO	NO	Both sides	NO	NO	YES	NO	medium	NO	YES	NO	NO	NO	NO	YES	YES	YES	NO	NO	YES	NO	NO	NO	NO	unchanged	YES	NO	NO	NO	NO	NO	NO	NO	NO	persistence	30-60 days
39	migraine	39	female	staff	153	53	years	Once in a few months	days	NO	NO	YES	NO	NO	NO	Both sides	YES	YES	NO	NO	medium	YES	NO	NO	NO	NO	NO	NO	YES	NO	NO	NO	YES	NO	NO	YES	NO	aggravate	NO	YES	NO	YES	NO	NO	NO	YES	NO	rest	Less than 15 days
40	migraine	24	female	student	160	60	years	Once in a few months	hours	NO	NO	NO	NO	NO	NO	One side	NO	YES	NO	NO	light	YES	NO	NO	NO	NO	NO	NO	YES	YES	NO	NO	NO	NO	NO	NO	NO	aggravate	NO	YES	NO	NO	NO	NO	NO	NO	NO	drug	Less than 15 days
41	migraine	31	female	student	160	42	years	Once in a few days	minutes	NO	NO	NO	YES	NO	NO	Both sides	NO	NO	YES	NO	light	YES	NO	NO	NO	NO	NO	NO	NO	YES	NO	NO	YES	NO	NO	NO	NO	unchanged	NO	YES	NO	NO	NO	YES	NO	NO	NO	persistence	15-30 days
42	migraine	53	female	unemployed	164	80	years	Once in a few months	days	YES	NO	NO	NO	NO	NO	One side	YES	NO	NO	YES	medium	YES	NO	NO	NO	NO	NO	NO	YES	NO	NO	NO	NO	NO	NO	YES	NO	unchanged	NO	NO	NO	NO	NO	YES	NO	NO	NO	drug	Less than 15 days
43	migraine	46	female	worker	158	63	years	Once in a few years	days	NO	YES	NO	NO	YES	NO	Full head	NO	NO	YES	NO	medium	YES	NO	NO	NO	NO	YES	NO	NO	NO	NO	NO	NO	NO	NO	NO	NO	unchanged	NO	YES	NO	YES	NO	YES	NO	NO	NO	rest	60-90 days
44	migraine	51	female	staff	153	59	years	Once in a few days	days	NO	NO	NO	NO	YES	NO	Full head	NO	NO	YES	NO	heavy	NO	NO	NO	YES	NO	NO	YES	YES	NO	NO	NO	NO	YES	NO	YES	NO	aggravate	NO	YES	NO	NO	NO	NO	YES	NO	NO	drug	30-60 days
45	migraine	27	male	worker	182	64	years	Once in a few weeks	hours	NO	NO	NO	NO	NO	NO	Alternate left and right	NO	NO	YES	NO	medium	YES	NO	NO	NO	NO	YES	NO	NO	NO	NO	NO	NO	YES	NO	NO	NO	aggravate	NO	YES	YES	NO	NO	YES	NO	NO	NO	drug	30-60 days
46	migraine	29	female	staff	158	44	years	Once in a few weeks	hours	NO	NO	NO	NO	YES	NO	One side	NO	NO	YES	NO	heavy	YES	NO	NO	NO	NO	NO	NO	YES	NO	NO	NO	NO	NO	NO	YES	NO	unchanged	NO	YES	NO	NO	NO	YES	NO	YES	NO	rest	Less than 15 days
47	migraine	30	female	staff	160	65	years	Once in a few months	hours	NO	YES	NO	NO	NO	NO	Both sides	NO	NO	YES	NO	medium	YES	NO	NO	NO	NO	NO	NO	YES	NO	NO	NO	NO	NO	NO	NO	NO	aggravate	NO	NO	NO	YES	NO	YES	NO	NO	NO	drug	Less than 15 days
48	migraine	28	female	staff	160	44	years	Once in a few months	hours	NO	NO	NO	NO	NO	NO	Both sides	NO	NO	YES	YES	heavy	NO	NO	NO	YES	NO	NO	NO	YES	YES	NO	NO	NO	NO	NO	NO	NO	unchanged	NO	NO	NO	NO	NO	YES	NO	YES	NO	drug	15-30 days
49	migraine	46	female	others	160	60	years	Once in a few years	hours	NO	YES	YES	YES	NO	NO	Both sides	YES	NO	YES	NO	heavy	YES	NO	NO	NO	NO	NO	NO	YES	YES	NO	NO	NO	NO	YES	NO	NO	unchanged	YES	NO	NO	YES	NO	NO	NO	NO	NO	drug	Less than 15 days
50	migraine	51	male	worker	168	66	years	Once in a few months	hours	YES	NO	NO	NO	NO	NO	One side	NO	NO	NO	YES	heavy	NO	NO	NO	YES	NO	NO	NO	NO	YES	YES	NO	NO	NO	NO	NO	NO	relieve	NO	YES	NO	NO	NO	NO	NO	YES	NO	drug	Less than 15 days
51	migraine	66	male	others	178	67	years	Once in a few weeks	minutes	NO	NO	NO	NO	NO	NO	Both sides	NO	YES	NO	NO	light	YES	NO	NO	NO	NO	YES	NO	NO	NO	NO	NO	YES	NO	NO	NO	NO	unchanged	YES	NO	NO	NO	NO	NO	NO	NO	NO	persistence	Less than 15 days
52	migraine	40	female	staff	162	54	years	Once in a few years	days	NO	NO	NO	NO	NO	NO	Full head	NO	NO	YES	NO	heavy	YES	NO	NO	NO	NO	NO	NO	YES	NO	NO	NO	NO	NO	NO	YES	NO	aggravate	NO	NO	NO	YES	NO	NO	NO	YES	NO	drug	Less than 15 days
53	migraine	35	female	staff	158	50	months	Once in a few weeks	hours	NO	NO	YES	NO	NO	NO	Alternate left and right	NO	NO	YES	NO	medium	YES	NO	NO	NO	NO	NO	YES	NO	NO	NO	NO	NO	NO	NO	NO	NO	relieve	NO	YES	NO	NO	NO	YES	NO	NO	NO	persistence	15-30 days
54	migraine	43	female	others	160	58	years	Once in a few years	hours	YES	NO	YES	NO	NO	NO	Both sides	YES	NO	NO	NO	medium	YES	NO	NO	NO	NO	NO	NO	YES	YES	NO	NO	NO	NO	NO	YES	NO	aggravate	NO	NO	NO	NO	NO	NO	NO	YES	NO	rest	Less than 15 days
55	migraine	64	male	others	186	92	months	Once in a few days	minutes	NO	NO	NO	NO	NO	NO	One side	NO	YES	NO	NO	heavy	NO	YES	YES	NO	NO	YES	NO	NO	NO	NO	NO	NO	NO	NO	NO	NO	unchanged	YES	NO	NO	NO	NO	NO	NO	NO	NO	persistence	15-30 days
56	migraine		male	unemployed	162	52	years	Once in a few months	hours	YES	NO	NO	NO	NO	NO	One side	YES	NO	NO	NO	light	YES	NO	NO	NO	NO	YES	NO	NO	NO	NO	NO	YES	NO	NO	NO	NO	aggravate	NO	NO	NO	NO	NO	NO	NO	YES	NO	drug	Less than 15 days
57	migraine	61	male	others	172	70	years	Once in a few weeks	hours	NO	NO	NO	NO	NO	NO	One side	NO	NO	YES	NO	medium	YES	NO	NO	NO	NO	NO	YES	NO	NO	NO	NO	NO	NO	NO	NO	NO	unchanged	NO	NO	NO	NO	NO	NO	YES	YES	NO	drug	Less than 15 days
58	migraine	72	male	unemployed	155	54	years	Once in a few days	days	NO	NO	NO	NO	NO	NO	Both sides	NO	NO	YES	NO	heavy	NO	NO	NO	YES	NO	NO	NO	NO	NO	YES	NO	YES	NO	NO	NO	NO	unchanged	NO	NO	NO	NO	NO	NO	NO	YES	NO	drug	Less than 15 days
59	migraine	71	male	unemployed	167	65	years	Once in a few months	hours	NO	NO	NO	NO	NO	NO	Alternate front and back	NO	YES	NO	NO	medium	YES	NO	NO	NO	NO	NO	NO	YES	NO	NO	NO	YES	NO	NO	YES	NO	unchanged	YES	NO	NO	NO	NO	NO	NO	NO	NO	drug	30-60 days
60	migraine	72	male	unemployed	170	75	years	Once in a few months	hours	NO	NO	NO	NO	NO	NO	One side	NO	YES	NO	NO	medium	NO	YES	NO	NO	NO	YES	NO	NO	NO	NO	NO	YES	NO	NO	NO	NO	relieve	NO	YES	NO	NO	NO	NO	NO	NO	NO	drug	Less than 15 days
61	migraine	64	male	unemployed	160	56	years	Once in a few months	hours	NO	NO	NO	NO	NO	NO	One side	YES	NO	NO	NO	medium	YES	NO	NO	NO	NO	YES	NO	NO	NO	NO	NO	NO	NO	NO	YES	NO	unchanged	NO	NO	NO	NO	NO	NO	NO	YES	NO	rest	Less than 15 days
62	tension-type headache	68	male	others	163	45	months	Once in a few days	minutes	NO	YES	NO	NO	NO	NO	Full head	YES	NO	NO	YES	light	YES	NO	NO	NO	NO	NO	YES	NO	NO	NO	NO	NO	NO	NO	NO	NO	unchanged	NO	NO	NO	NO	YES	NO	NO	NO	NO	rest	60-90 days
63	tension-type headache	70	female	others	165	65	years	Once in a few weeks	hours	NO	YES	NO	NO	NO	NO	Alternate left and right	NO	YES	YES	NO	medium	YES	NO	NO	NO	NO	YES	NO	NO	NO	NO	NO	YES	NO	NO	NO	NO	aggravate	NO	YES	NO	NO	NO	NO	NO	YES	NO	drug	30-60 days
64	tension-type headache	56	female	staff	164	57	months	Once in a few days	hours	NO	NO	YES	NO	NO	NO	Alternate front and back	NO	YES	NO	NO	light	YES	NO	NO	NO	NO	YES	NO	NO	NO	NO	NO	NO	NO	NO	YES	NO	unchanged	NO	NO	NO	NO	NO	YES	YES	NO	NO	rest	Less than 15 days
65	tension-type headache	48	female	unemployed	155	50	years	Once in a few months	hours	NO	NO	NO	NO	NO	NO	One side	YES	YES	YES	NO	medium	YES	NO	NO	NO	NO	YES	NO	NO	NO	NO	NO	YES	NO	NO	NO	NO	unchanged	YES	NO	NO	NO	NO	NO	NO	NO	NO	persistence	30-60 days
66	tension-type headache	53	female	others	153	53	months	Once in a few days	minutes	NO	NO	NO	NO	NO	NO	One side	YES	NO	NO	NO	medium	YES	NO	NO	NO	NO	YES	NO	NO	NO	NO	NO	NO	NO	NO	NO	NO	unchanged	NO	NO	NO	NO	NO	NO	NO	YES	NO	persistence	Less than 15 days
67	tension-type headache	45	male	staff	175	72	months	Once in a few weeks	hours	NO	NO	YES	YES	NO	NO	Both sides	NO	NO	YES	YES	medium	NO	NO	YES	NO	NO	NO	NO	YES	YES	NO	NO	YES	NO	NO	NO	NO	relieve	NO	YES	NO	NO	NO	NO	NO	NO	NO	drug	15-30 days
68	tension-type headache	38	male	staff	180	85	months	Once in a few months	days	NO	NO	NO	NO	NO	NO	One side	NO	YES	NO	NO	light	YES	NO	NO	NO	NO	YES	NO	NO	NO	NO	NO	NO	NO	NO	NO	NO	unchanged	NO	YES	NO	NO	NO	YES	NO	NO	NO	persistence	Less than 15 days
69	tension-type headache	61	male	worker	173	65	years	Once in a few weeks	hours	NO	NO	NO	NO	NO	NO	Full head	NO	YES	YES	NO	medium	YES	NO	NO	NO	NO	NO	YES	YES	NO	NO	NO	YES	NO	NO	NO	NO	relieve	NO	YES	NO	NO	NO	YES	NO	NO	NO	rest	30-60 days
70	tension-type headache	65	male	worker	170	65	months	Once in a few days	hours	NO	NO	NO	NO	NO	NO	Both sides	NO	YES	NO	YES	medium	YES	NO	NO	NO	NO	NO	YES	NO	NO	NO	NO	NO	NO	NO	NO	NO	unchanged	NO	YES	NO	NO	NO	NO	NO	NO	NO	drug	Less than 15 days
71	tension-type headache	54	female	farmer	155	56	months	Once in a few months	days	NO	NO	YES	YES	NO	NO	Full head	YES	YES	YES	YES	medium	YES	NO	NO	NO	NO	YES	NO	NO	NO	NO	NO	YES	NO	NO	YES	NO	aggravate	YES	NO	NO	NO	NO	NO	NO	NO	NO	rest	Less than 15 days
72	tension-type headache	52	female	worker	165	45	months	Once in a few weeks	days	NO	NO	NO	NO	NO	NO	Both sides	NO	NO	YES	NO	medium	YES	NO	NO	NO	NO	YES	NO	NO	NO	NO	NO	NO	NO	NO	NO	NO	relieve	YES	NO	NO	NO	NO	NO	NO	NO	NO	rest	Less than 15 days
73	tension-type headache	29	female	others	160	50	months	Once in a few weeks	hours	NO	NO	NO	YES	NO	NO	Alternate left and right	YES	NO	NO	NO	light	YES	NO	NO	NO	NO	YES	NO	NO	NO	NO	NO	NO	NO	NO	NO	NO	unchanged	NO	YES	NO	NO	NO	NO	NO	NO	NO	rest	Less than 15 days
74	tension-type headache	32	female	staff	157	49	months	Once in a few months	minutes	NO	NO	YES	YES	NO	NO	One side	YES	NO	YES	NO	medium	YES	NO	NO	NO	NO	YES	NO	NO	NO	NO	NO	YES	NO	NO	NO	NO	aggravate	NO	YES	NO	NO	NO	YES	NO	YES	NO	rest	Less than 15 days
75	tension-type headache	24	female	staff	160	45	months	Once in a few months	days	NO	NO	YES	NO	NO	NO	Both sides	NO	NO	YES	NO	light	YES	NO	NO	NO	NO	NO	NO	NO	YES	NO	NO	NO	NO	NO	NO	NO	relieve	NO	YES	NO	YES	NO	YES	NO	NO	NO	drug	Less than 15 days
76	tension-type headache	61	female	staff	168	65	years	Once in a few weeks	days	NO	NO	YES	NO	NO	NO	Full head	YES	YES	YES	YES	medium	YES	NO	NO	NO	NO	YES	NO	NO	NO	NO	NO	NO	NO	NO	NO	NO	unchanged	NO	YES	NO	NO	NO	YES	NO	NO	NO	rest	Less than 15 days
77	tension-type headache	57	female	worker	159	52	months	Once in a few days	minutes	NO	NO	NO	NO	NO	NO	Both sides	NO	NO	YES	NO	light	YES	NO	NO	NO	NO	YES	NO	NO	NO	NO	NO	NO	NO	NO	NO	NO	unchanged	YES	NO	NO	NO	NO	NO	NO	NO	NO	rest	60-90 days
78	tension-type headache	45	male	worker	170	90	years	Once in a few days	hours	NO	NO	NO	NO	NO	NO	Full head	YES	NO	NO	NO	heavy	YES	NO	NO	NO	NO	YES	NO	NO	NO	NO	NO	NO	NO	NO	NO	NO	relieve	YES	NO	NO	NO	NO	NO	NO	NO	NO	rest	60-90 days
79	tension-type headache	36	female	staff	161	43	years	Once in a few days	hours	NO	NO	NO	YES	NO	NO	One side	YES	NO	NO	NO	medium	YES	NO	NO	NO	NO	YES	NO	NO	NO	NO	NO	NO	NO	NO	NO	NO	aggravate	NO	NO	NO	NO	NO	YES	NO	NO	NO	drug	60-90 days
80	tension-type headache	62	male	others	170	66	months	Once in a few days	minutes	YES	NO	NO	NO	NO	NO	Both sides	NO	YES	NO	NO	light	YES	NO	NO	NO	NO	YES	NO	NO	NO	NO	NO	NO	NO	NO	NO	NO	unchanged	NO	YES	NO	NO	NO	NO	NO	NO	NO	rest	15-30 days
81	tension-type headache	30	male	staff	180	70	years	Once in a few months	days	NO	NO	NO	NO	NO	NO	Full head	YES	NO	NO	NO	medium	YES	NO	NO	NO	NO	NO	NO	YES	YES	NO	NO	NO	NO	NO	NO	NO	aggravate	NO	YES	NO	NO	NO	YES	NO	NO	NO	drug	15-30 days
82	tension-type headache	73	male	worker	160	92	years	Once in a few months	days	NO	NO	NO	NO	NO	NO	One side	YES	NO	NO	NO	medium	YES	NO	NO	NO	NO	YES	NO	NO	NO	NO	YES	NO	NO	NO	NO	NO	unchanged	NO	YES	NO	NO	NO	YES	NO	NO	NO	rest	Less than 15 days
83	tension-type headache	44	male	worker	167	60	years	Once in a few weeks	minutes	NO	YES	NO	NO	NO	NO	Both sides	NO	NO	YES	NO	light	NO	NO	NO	YES	NO	NO	NO	YES	NO	NO	NO	YES	NO	NO	NO	NO	aggravate	NO	NO	NO	NO	NO	YES	NO	YES	NO	rest	Less than 15 days
84	tension-type headache	60	male	others	166	72	years	Once in a few months	hours	NO	NO	NO	NO	NO	NO	Alternate front and back	NO	NO	YES	NO	medium	YES	NO	NO	NO	NO	YES	NO	NO	NO	NO	NO	NO	NO	NO	NO	NO	unchanged	NO	YES	NO	NO	NO	NO	NO	NO	NO	drug	Less than 15 days
85	tension-type headache	73	male	others	158	80	years	Once in a few days	hours	NO	NO	NO	NO	NO	NO	One side	NO	NO	YES	NO	medium	YES	NO	NO	NO	NO	YES	NO	NO	NO	NO	YES	NO	NO	NO	NO	NO	unchanged	YES	NO	NO	NO	NO	NO	NO	NO	NO	persistence	Less than 15 days
86	tension-type headache	61	male	others	165	76	months	Once in a few days	minutes	NO	NO	NO	NO	NO	NO	Both sides	NO	NO	YES	NO	medium	NO	NO	NO	YES	NO	YES	NO	NO	NO	NO	NO	YES	NO	NO	NO	NO	unchanged	YES	NO	NO	NO	NO	NO	NO	NO	NO	persistence	Less than 15 days
87	tension-type headache	32	female	staff	157	63	months	Once in a few days	days	NO	NO	NO	NO	NO	NO	Both sides	NO	NO	YES	NO	heavy	YES	NO	NO	NO	NO	NO	NO	YES	NO	NO	NO	NO	NO	NO	NO	NO	unchanged	YES	NO	NO	NO	NO	NO	NO	NO	NO	persistence	Less than 15 days
88	tension-type headache	61	male	others	167	71	years	Once in a few years	days	NO	NO	NO	NO	NO	NO	Both sides	YES	NO	NO	NO	medium	YES	NO	NO	NO	NO	YES	NO	NO	NO	NO	NO	NO	NO	NO	NO	NO	unchanged	NO	YES	NO	NO	NO	NO	NO	NO	NO	persistence	Less than 15 days
89	tension-type headache	62	male	others	178	70	years	Once in a few weeks	days	NO	NO	NO	NO	NO	NO	Both sides	NO	YES	YES	NO	light	YES	NO	NO	NO	NO	YES	NO	NO	NO	NO	NO	YES	NO	NO	NO	NO	aggravate	YES	NO	NO	NO	NO	NO	NO	NO	NO	rest	60-90 days
90	tension-type headache	32	female	staff	160	60	months	Once in a few days	minutes	NO	NO	NO	NO	NO	NO	Both sides	NO	NO	YES	NO	heavy	YES	NO	NO	NO	NO	NO	NO	YES	NO	NO	NO	NO	NO	NO	NO	NO	unchanged	YES	NO	NO	NO	NO	NO	NO	NO	NO	drug	Less than 15 days
91	tension-type headache	57	female	others	160	60	years	Once in a few months	days	NO	NO	NO	NO	NO	NO	One side	NO	YES	NO	NO	light	YES	NO	NO	NO	NO	YES	NO	NO	NO	NO	NO	YES	NO	NO	NO	NO	unchanged	YES	NO	NO	NO	NO	NO	NO	NO	NO	rest	Less than 15 days
92	tension-type headache	50	male	staff	180	72	months	Once in a few days	minutes	NO	NO	NO	YES	NO	NO	One side	NO	YES	NO	NO	light	YES	NO	NO	NO	NO	NO	YES	NO	NO	NO	NO	NO	NO	NO	YES	NO	unchanged	YES	NO	NO	NO	NO	NO	NO	NO	NO	rest	Less than 15 days
93	tension-type headache	48	female	staff	161	60	years	Once in a few weeks	hours	NO	NO	NO	NO	NO	NO	Alternate front and back	YES	YES	NO	NO	medium	YES	NO	NO	NO	NO	YES	NO	NO	NO	NO	NO	NO	NO	NO	YES	NO	unchanged	NO	YES	NO	NO	NO	NO	NO	NO	NO	rest	Less than 15 days
94	tension-type headache	32	female	others	154	45	years	Once in a few days	hours	NO	NO	NO	NO	NO	NO	Full head	NO	NO	YES	NO	medium	YES	NO	NO	NO	NO	YES	NO	NO	NO	NO	YES	YES	NO	NO	NO	NO	unchanged	YES	NO	NO	NO	NO	NO	NO	NO	NO	drug	Less than 15 days
95	tension-type headache	60	female	unemployed	164	65	years	Once in a few months	minutes	NO	NO	YES	NO	NO	NO	Full head	YES	NO	YES	NO	heavy	NO	YES	NO	NO	NO	YES	NO	NO	NO	NO	YES	YES	NO	NO	YES	NO	unchanged	NO	YES	NO	NO	NO	NO	NO	NO	NO	else	Less than 15 days
96	tension-type headache	76	female	unemployed	165	56	years	Once in a few weeks	minutes	NO	NO	YES	NO	NO	NO	One side	NO	YES	NO	NO	medium	YES	NO	NO	NO	NO	YES	NO	NO	NO	NO	NO	NO	NO	NO	NO	NO	relieve	NO	NO	NO	NO	NO	NO	NO	NO	NO	else	Less than 15 days
97	tension-type headache	78	male	unemployed	171	87	years	Once in a few months	minutes	NO	NO	NO	NO	NO	NO	Alternate front and back	NO	YES	NO	NO	medium	YES	NO	NO	NO	NO	YES	NO	NO	NO	NO	YES	YES	NO	NO	YES	NO	unchanged	NO	YES	NO	NO	NO	NO	NO	NO	NO	else	Less than 15 days
98	tension-type headache	70	female	unemployed	164	84	years	Once in a few months	days	YES	NO	NO	NO	NO	NO	Full head	NO	YES	YES	NO	medium	NO	YES	NO	NO	NO	NO	NO	YES	NO	NO	YES	YES	NO	NO	YES	NO	unchanged	NO	YES	NO	NO	NO	NO	NO	NO	NO	drug	Less than 15 days
99	tension-type headache	65	female	unemployed	147	55	years	Once in a few months	hours	NO	NO	YES	NO	NO	NO	Alternate front and back	NO	YES	NO	NO	medium	YES	NO	NO	NO	NO	NO	YES	NO	NO	NO	NO	YES	NO	NO	NO	NO	unchanged	NO	YES	NO	NO	NO	NO	NO	NO	NO	rest	Less than 15 days
100	tension-type headache	73	male	worker	160	46	years	Once in a few months	days	NO	NO	NO	NO	NO	NO	Both sides	YES	NO	NO	NO	medium	YES	NO	NO	NO	NO	YES	NO	NO	NO	NO	YES	NO	NO	NO	NO	NO	unchanged	NO	YES	NO	NO	NO	YES	NO	NO	NO	drug	Less than 15 days
101	tension-type headache	77	female	unemployed	170	70	months	Once in a few days	minutes	YES	YES	NO	NO	NO	NO	One side	NO	NO	YES	NO	medium	YES	NO	NO	NO	NO	YES	NO	NO	NO	NO	NO	NO	NO	NO	YES	NO	relieve	YES	NO	NO	NO	NO	NO	NO	NO	NO	persistence	15-30 days
102	tension-type headache	32	female	staff	157	53	years	Once in a few months	days	NO	NO	NO	NO	NO	NO	One side	NO	NO	NO	YES	medium	YES	NO	NO	NO	NO	YES	NO	NO	NO	NO	NO	NO	NO	NO	NO	NO	aggravate	NO	YES	NO	YES	NO	NO	NO	NO	NO	drug	Less than 15 days
103	tension-type headache	31	female	staff	170	60	years	Once in a few weeks	hours	NO	NO	NO	NO	NO	NO	Both sides	YES	YES	NO	NO	medium	YES	NO	NO	NO	NO	NO	YES	YES	NO	NO	NO	NO	YES	NO	NO	NO	aggravate	NO	NO	NO	YES	NO	NO	NO	YES	NO	drug	Less than 15 days
104	tension-type headache	34	male	staff	170	73	years	Once in a few days	days	NO	NO	NO	NO	NO	NO	Full head	NO	YES	NO	YES	medium	YES	NO	NO	NO	NO	NO	YES	NO	NO	NO	NO	NO	NO	NO	YES	NO	aggravate	NO	YES	NO	NO	NO	YES	NO	NO	YES	drug	30-60 days
105	tension-type headache	31	female	staff	150	54	months	Once in a few months	hours	NO	NO	NO	NO	NO	NO	Both sides	NO	NO	YES	NO	light	YES	NO	NO	NO	NO	NO	NO	NO	YES	NO	NO	NO	NO	NO	NO	NO	unchanged	NO	YES	NO	NO	NO	YES	NO	NO	NO	rest	15-30 days
106	tension-type headache	54	female	unemployed	160	60	months	Once in a few days	hours	NO	NO	NO	NO	NO	NO	Alternate front and back	YES	NO	NO	NO	medium	YES	NO	NO	NO	NO	YES	NO	NO	NO	NO	NO	NO	NO	NO	YES	NO	aggravate	NO	NO	NO	NO	NO	YES	NO	NO	NO	rest	15-30 days
107	tension-type headache	20	female	student	167	70	years	Once in a few months	days	NO	NO	NO	NO	NO	NO	Both sides	YES	NO	NO	NO	light	YES	NO	NO	NO	NO	YES	NO	NO	NO	NO	NO	NO	NO	NO	NO	NO	aggravate	NO	NO	NO	YES	NO	NO	NO	NO	NO	else	15-30 days
108	tension-type headache	45	male	farmer	168	65	months	Once in a few weeks	days	NO	NO	NO	NO	NO	NO	Both sides	NO	YES	NO	NO	medium	YES	NO	NO	NO	NO	YES	NO	NO	NO	NO	NO	NO	NO	NO	YES	NO	unchanged	NO	NO	NO	NO	YES	NO	NO	NO	NO	rest	15-30 days
109	tension-type headache	27	female	unemployed	157	62	months	Once in a few weeks	days	NO	NO	YES	NO	NO	NO	Full head	NO	YES	YES	NO	medium	YES	NO	NO	NO	NO	NO	NO	YES	NO	NO	NO	NO	NO	NO	YES	NO	unchanged	NO	YES	YES	NO	NO	NO	NO	YES	NO	persistence	15-30 days
110	tension-type headache	64	male	unemployed	170	74	years	Once in a few days	hours	NO	NO	NO	NO	NO	NO	One side	NO	YES	NO	NO	medium	YES	NO	NO	NO	NO	YES	NO	NO	NO	NO	NO	NO	NO	NO	YES	NO	unchanged	NO	NO	NO	NO	YES	NO	NO	NO	NO	rest	Less than 15 days
111	tension-type headache	46	female	unemployed	157	58	years	Once in a few months	hours	NO	NO	YES	NO	NO	NO	Alternate front and back	NO	YES	YES	NO	heavy	NO	YES	YES	NO	NO	YES	NO	NO	NO	NO	YES	YES	NO	NO	YES	NO	aggravate	YES	NO	NO	NO	NO	NO	NO	NO	NO	drug	Less than 15 days
112	tension-type headache	72	female	others	160	60	years	Once in a few days	days	NO	NO	YES	NO	NO	NO	Full head	YES	NO	NO	NO	medium	YES	NO	NO	NO	NO	YES	NO	NO	NO	NO	NO	NO	NO	NO	NO	NO	unchanged	YES	NO	NO	NO	NO	NO	NO	NO	NO	else	60-90 days
113	tension-type headache	46	female	worker	165	55	years	Once in a few months	days	NO	YES	NO	YES	NO	NO	Full head	NO	NO	YES	NO	medium	YES	NO	NO	NO	NO	YES	NO	NO	NO	NO	NO	NO	NO	NO	NO	NO	unchanged	YES	NO	NO	NO	NO	NO	NO	NO	NO	drug	Less than 15 days
114	tension-type headache	67	female	unemployed	160	56	months	Once in a few months	days	NO	NO	NO	YES	NO	NO	Full head	YES	NO	NO	NO	medium	YES	NO	NO	NO	NO	NO	NO	YES	NO	NO	NO	NO	NO	NO	NO	YES	aggravate	YES	NO	NO	NO	NO	NO	NO	NO	NO	rest	Less than 15 days
115	tension-type headache	25	male	worker	170	50	months	Once in a few days	minutes	NO	NO	YES	NO	NO	NO	Alternate front and back	NO	YES	NO	NO	heavy	NO	NO	YES	NO	NO	NO	NO	YES	NO	NO	YES	NO	NO	NO	YES	NO	unchanged	NO	YES	NO	NO	NO	YES	NO	NO	NO	persistence	Less than 15 days
116	tension-type headache	59	female	worker	167	55	months	Once in a few weeks	minutes	NO	NO	NO	YES	NO	NO	One side	YES	NO	NO	NO	light	YES	NO	NO	NO	NO	YES	NO	NO	NO	NO	NO	YES	NO	NO	NO	NO	unchanged	NO	NO	NO	NO	NO	NO	NO	YES	NO	drug	Less than 15 days
117	tension-type headache	67	female	unemployed	168	69	years	Once in a few weeks	minutes	NO	NO	NO	NO	NO	NO	Full head	NO	YES	YES	NO	medium	YES	NO	NO	NO	NO	YES	NO	NO	NO	NO	NO	YES	NO	NO	NO	NO	unchanged	YES	NO	NO	NO	NO	NO	NO	NO	NO	persistence	Less than 15 days
118	tension-type headache	88	male	unemployed	170	70	years	Once in a few days	hours	YES	YES	NO	NO	NO	NO	One side	YES	NO	NO	NO	medium	YES	NO	NO	YES	NO	YES	NO	NO	NO	NO	YES	NO	NO	NO	YES	NO	unchanged	NO	NO	NO	NO	NO	NO	YES	NO	NO	drug	Less than 15 days
119	tension-type headache	66	male	farmer	160	60	years	Once in a few years	days	NO	NO	NO	YES	NO	NO	Both sides	YES	NO	NO	NO	light	NO	NO	YES	NO	NO	NO	NO	YES	NO	NO	NO	YES	NO	NO	NO	NO	relieve	NO	NO	NO	NO	NO	NO	NO	YES	NO	persistence	Less than 15 days
120	tension-type headache	48	male	farmer	160	80	years	Once in a few months	hours	NO	NO	YES	NO	NO	NO	Both sides	YES	NO	NO	NO	medium	YES	NO	NO	NO	NO	YES	NO	NO	NO	NO	NO	NO	NO	NO	NO	NO	aggravate	NO	YES	YES	NO	NO	NO	YES	NO	NO	drug	Less than 15 days
121	tension-type headache	81	male	farmer	160	80	months	Once in a few days	days	NO	NO	NO	NO	NO	NO	Both sides	NO	YES	NO	NO	light	YES	NO	NO	NO	NO	YES	NO	NO	NO	NO	NO	NO	NO	NO	YES	NO	unchanged	YES	NO	NO	NO	NO	NO	NO	NO	NO	rest	15-30-60 days 0 days
122	tension-type headache	78	female	farmer	160	80	months	Once in a few days	days	NO	NO	YES	NO	NO	NO	One side	NO	YES	YES	NO	medium	YES	NO	NO	NO	NO	YES	NO	NO	NO	NO	NO	NO	NO	NO	YES	NO	unchanged	NO	YES	NO	NO	NO	NO	NO	NO	NO	rest	Less than 15 days
123	tension-type headache	48	male	worker	160	80	years	Once in a few weeks	hours	NO	NO	NO	NO	NO	NO	Both sides	NO	YES	NO	NO	medium	YES	NO	NO	NO	NO	YES	NO	NO	NO	NO	NO	NO	NO	NO	YES	NO	unchanged	NO	YES	YES	NO	NO	NO	NO	NO	NO	drug	Less than 15 days
124	tension-type headache	38	female	farmer	160	80	months	Once in a few days	days	NO	NO	NO	NO	NO	NO	Both sides	NO	YES	NO	NO	light	YES	NO	NO	NO	NO	YES	NO	NO	NO	NO	NO	NO	NO	NO	YES	NO	unchanged	NO	YES	NO	NO	NO	NO	NO	NO	NO	rest	Less than 15 days
125	tension-type headache	28	male	staff	175	87	months	Once in a few days	hours	NO	NO	NO	NO	NO	NO	One side	NO	YES	NO	NO	light	YES	NO	NO	NO	NO	YES	NO	NO	NO	NO	NO	NO	NO	NO	NO	NO	unchanged	YES	NO	NO	NO	NO	NO	NO	NO	NO	rest	Less than 15 days
126	tension-type headache	50	male	worker	170	75	months	Once in a few days	days	NO	NO	YES	NO	NO	NO	Both sides	NO	YES	NO	NO	medium	YES	NO	NO	NO	NO	YES	NO	NO	NO	NO	NO	NO	NO	NO	NO	NO	unchanged	YES	NO	NO	NO	NO	NO	NO	NO	NO	rest	Less than 15 days
127	tension-type headache	77	female	unemployed	150	40	months	Once in a few days	hours	NO	NO	YES	NO	NO	NO	Both sides	YES	NO	NO	NO	medium	YES	NO	NO	NO	NO	YES	NO	NO	NO	NO	NO	NO	NO	NO	NO	NO	unchanged	NO	YES	YES	NO	NO	NO	NO	NO	NO	rest	15-30 days
128	tension-type headache	32	female	staff	160	80	years	Once in a few days	days	NO	NO	YES	NO	NO	NO	Both sides	YES	YES	NO	NO	light	YES	NO	NO	NO	NO	YES	NO	NO	NO	NO	NO	NO	NO	NO	NO	NO	unchanged	NO	NO	NO	NO	NO	YES	NO	NO	NO	rest	60-90 days
129	tension-type headache	55	female	farmer	160	80	years	Once in a few days	days	YES	NO	NO	NO	NO	NO	Both sides	NO	YES	NO	NO	medium	YES	NO	NO	NO	NO	NO	NO	YES	NO	NO	NO	NO	NO	NO	NO	NO	unchanged	YES	NO	NO	NO	NO	NO	NO	NO	NO	rest	60-90 days
130	tension-type headache	34	male	staff	160	80	years	Once in a few weeks	hours	YES	NO	NO	NO	NO	NO	Full head	NO	NO	NO	YES	medium	YES	NO	NO	NO	NO	YES	NO	NO	NO	NO	NO	NO	NO	NO	NO	NO	unchanged	NO	NO	YES	NO	NO	YES	NO	NO	NO	rest	Less than 15 days
131	tension-type headache	36	male	farmer	160	71	years	Once in a few months	days	NO	NO	NO	NO	NO	NO	Full head	YES	YES	YES	NO	medium	YES	NO	NO	NO	NO	YES	NO	NO	NO	NO	NO	NO	NO	NO	NO	NO	unchanged	YES	NO	NO	NO	NO	NO	NO	NO	NO	rest	Less than 15 days
132	tension-type headache	49	female	staff	160	80	months	Once in a few days	days	NO	NO	YES	NO	NO	NO	Both sides	YES	NO	NO	NO	light	YES	NO	NO	NO	NO	YES	NO	NO	NO	NO	NO	NO	NO	NO	NO	NO	unchanged	YES	NO	NO	NO	NO	NO	NO	NO	NO	rest	Less than 15 days
133	tension-type headache	44	female	worker	160	80	months	Once in a few days	days	NO	NO	NO	NO	NO	NO	Both sides	YES	YES	NO	NO	light	YES	NO	NO	NO	NO	YES	NO	NO	NO	NO	NO	NO	NO	NO	NO	NO	unchanged	YES	NO	NO	NO	NO	NO	NO	NO	NO	rest	15-30 days
134	tension-type headache	39	male	worker	160	80	years	Once in a few months	days	NO	NO	NO	NO	NO	NO	Both sides	YES	YES	NO	NO	light	YES	NO	NO	NO	NO	YES	NO	NO	NO	NO	NO	NO	NO	NO	YES	NO	unchanged	NO	YES	YES	NO	NO	NO	NO	NO	NO	rest	Less than 15 days
135	tension-type headache	61	male	farmer	160	80	years	Once in a few weeks	hours	NO	NO	NO	NO	NO	NO	Both sides	YES	NO	NO	NO	light	YES	NO	NO	NO	NO	YES	NO	NO	NO	NO	NO	YES	NO	NO	NO	NO	aggravate	NO	YES	YES	NO	NO	YES	NO	NO	NO	rest	Less than 15 days
136	tension-type headache	57	female	worker	160	80	years	Once in a few days	hours	NO	NO	YES	NO	NO	NO	Both sides	YES	YES	NO	NO	light	YES	NO	NO	NO	NO	YES	NO	NO	NO	NO	NO	NO	NO	NO	YES	NO	unchanged	NO	YES	NO	NO	NO	YES	NO	NO	NO	rest	Less than 15 days
137	tension-type headache	48	male	farmer	160	80	months	Once in a few days	days	NO	NO	YES	NO	NO	NO	Both sides	YES	NO	YES	NO	medium	YES	NO	NO	NO	NO	YES	NO	NO	NO	NO	NO	YES	NO	NO	YES	NO	unchanged	NO	YES	NO	NO	NO	NO	NO	NO	NO	rest	Less than 15 days
138	migraine	37	female	staff	160	56	years	Once in a few days	hours	YES	NO	NO	NO	NO	NO	Both sides	NO	YES	YES	NO	heavy	YES	NO	NO	NO	NO	NO	NO	YES	NO	NO	NO	NO	NO	NO	NO	NO	aggravate	YES	NO	NO	NO	NO	NO	NO	NO	NO	drug	Less than 15 days
139	migraine	60	male	staff	170	57	years	Once in a few days	days	NO	NO	NO	NO	NO	NO	One side	NO	YES	YES	NO	light	YES	NO	NO	NO	NO	YES	NO	NO	NO	NO	NO	NO	NO	NO	NO	NO	unchanged	YES	NO	NO	NO	NO	NO	NO	NO	NO	rest	15-30 days
140	migraine	28	female	farmer	160	80	years	Once in a few months	hours	YES	NO	NO	NO	NO	NO	One side	YES	NO	NO	NO	medium	NO	YES	NO	NO	NO	YES	NO	NO	NO	NO	NO	NO	NO	NO	NO	NO	aggravate	NO	YES	NO	NO	NO	NO	NO	NO	NO	drug	Less than 15 days
141	migraine	41	female	staff	160	80	years	Once in a few days	hours	YES	NO	NO	NO	NO	NO	One side	YES	NO	YES	NO	medium	YES	NO	NO	NO	NO	YES	NO	NO	NO	NO	NO	NO	NO	NO	NO	NO	aggravate	NO	NO	NO	YES	NO	NO	NO	NO	NO	drug	15-30 days
142	migraine	30	female	worker	160	80	years	Once in a few months	days	YES	NO	NO	NO	NO	NO	One side	YES	NO	YES	NO	medium	YES	NO	NO	NO	NO	NO	NO	YES	YES	NO	NO	NO	NO	NO	NO	NO	aggravate	YES	NO	NO	NO	NO	NO	NO	NO	NO	drug	Less than 15 days
143	migraine	32	male	staff	160	80	years	Once in a few days	hours	YES	NO	NO	NO	NO	NO	One side	YES	NO	NO	NO	medium	YES	NO	NO	NO	NO	NO	NO	NO	YES	NO	NO	NO	NO	NO	NO	NO	aggravate	NO	YES	NO	NO	NO	NO	NO	NO	NO	drug	Less than 15 days
144	migraine	25	female	staff	160	80	years	Once in a few years	days	YES	NO	NO	NO	NO	NO	One side	NO	NO	YES	NO	heavy	YES	NO	NO	NO	NO	YES	NO	NO	NO	NO	NO	NO	NO	NO	NO	NO	aggravate	NO	YES	NO	NO	NO	NO	NO	NO	NO	persistence	15-30 days
145	migraine	80	female	farmer	160	80	months	Once in a few days	hours	NO	NO	NO	NO	NO	NO	One side	YES	NO	NO	NO	light	YES	NO	NO	NO	NO	YES	NO	NO	NO	NO	NO	NO	NO	NO	NO	NO	aggravate	NO	YES	NO	NO	NO	NO	NO	NO	NO	rest	Less than 15 days
146	migraine	36	male	staff	160	80	years	Once in a few weeks	hours	YES	NO	NO	NO	NO	NO	One side	NO	NO	YES	NO	medium	YES	NO	NO	NO	NO	YES	NO	NO	NO	NO	NO	NO	NO	NO	NO	NO	aggravate	NO	YES	NO	NO	NO	NO	NO	NO	NO	drug	Less than 15 days
147	migraine	44	female	farmer	160	80	years	Once in a few weeks	hours	YES	NO	NO	NO	NO	NO	One side	NO	NO	YES	NO	medium	YES	NO	NO	NO	NO	NO	NO	NO	YES	NO	NO	NO	NO	NO	NO	NO	aggravate	NO	YES	NO	YES	NO	NO	NO	NO	NO	drug	Less than 15 days
148	tension-type headache	60	female	worker	155	62	months	Once in a few days	hours	NO	NO	NO	NO	NO	NO	One side	YES	NO	NO	NO	light	YES	NO	NO	NO	NO	YES	NO	NO	NO	NO	NO	NO	NO	NO	NO	NO	unchanged	NO	NO	NO	NO	NO	YES	NO	NO	NO	rest	Less than 15 days
149	tension-type headache	86	male	unemployed	167	72	years	Once in a few weeks	days	NO	NO	NO	NO	NO	NO	Both sides	YES	NO	NO	NO	light	YES	NO	NO	NO	NO	YES	NO	NO	NO	NO	NO	NO	NO	NO	NO	NO	unchanged	YES	NO	NO	NO	NO	NO	NO	NO	NO	rest	Less than 15 days
150	tension-type headache	65	male	worker	161	56	years	Once in a few weeks	hours	NO	NO	NO	NO	NO	NO	One side	YES	NO	NO	NO	medium	YES	NO	NO	NO	NO	YES	NO	NO	NO	NO	NO	YES	NO	NO	NO	NO	unchanged	NO	YES	NO	NO	NO	NO	NO	NO	NO	drug	Less than 15 days
151	migraine	21	female	student	150	38	years	Once in a few days	hours	YES	YES	NO	YES	NO	NO	Full head	YES	YES	YES	YES	heavy	NO	NO	YES	NO	NO	YES	NO	NO	NO	NO	NO	NO	NO	NO	NO	NO	unchanged	NO	YES	NO	NO	NO	NO	NO	NO	NO	drug	Less than 15 days
152	tension-type headache	45	female	worker	150	46	years	Once in a few weeks	minutes	NO	NO	YES	NO	NO	NO	Full head	YES	YES	YES	YES	light	YES	NO	NO	NO	NO	NO	NO	YES	NO	NO	NO	NO	NO	NO	NO	NO	unchanged	NO	YES	NO	NO	NO	NO	NO	NO	NO	persistence	Less than 15 days
153	tension-type headache	18	female	student	155	48	years	Once in a few days	days	NO	NO	YES	NO	YES	NO	Full head	NO	YES	NO	NO	heavy	YES	NO	NO	NO	NO	YES	NO	NO	NO	NO	NO	NO	NO	NO	NO	NO	unchanged	YES	NO	NO	NO	NO	NO	NO	NO	NO	persistence	30-60 days
154	tension-type headache	69	male	unemployed	165	60	years	Once in a few days	minutes	NO	NO	NO	YES	NO	NO	One side	YES	NO	NO	NO	light	YES	NO	NO	NO	NO	YES	NO	NO	NO	NO	NO	YES	NO	NO	NO	NO	aggravate	NO	NO	NO	NO	NO	YES	NO	NO	NO	rest	60-90 days
155	tension-type headache	65	female	unemployed	158	67	years	Once in a few months	hours	NO	NO	NO	YES	NO	NO	One side	NO	NO	YES	NO	medium	YES	NO	NO	NO	NO	YES	NO	NO	NO	NO	NO	NO	NO	NO	YES	NO	unchanged	NO	NO	NO	NO	NO	YES	NO	NO	NO	drug	Less than 15 days
156	migraine	71	female	unemployed	153	45	years	Once in a few weeks	days	NO	NO	YES	NO	NO	NO	Both sides	YES	NO	NO	NO	light	YES	NO	NO	NO	NO	YES	NO	NO	NO	NO	NO	YES	NO	NO	NO	NO	aggravate	NO	YES	NO	NO	NO	NO	NO	NO	NO	drug	15-30 days
157	tension-type headache	53	female	staff	167	62	years	Once in a few months	days	NO	NO	YES	NO	NO	NO	One side	NO	YES	YES	NO	heavy	YES	NO	NO	NO	NO	YES	NO	NO	NO	NO	NO	YES	NO	NO	NO	NO	unchanged	NO	YES	NO	NO	NO	NO	NO	NO	NO	drug	Less than 15 days
158	migraine	46	female	staff	168	60	years	Once in a few months	hours	NO	NO	NO	YES	NO	NO	Both sides	NO	YES	YES	NO	medium	YES	NO	NO	NO	NO	NO	NO	YES	NO	NO	NO	YES	NO	NO	NO	NO	unchanged	NO	YES	NO	YES	NO	NO	NO	NO	NO	drug	15-30 days
159	migraine	41	female	staff			years	Once in a few months	hours	NO	NO	NO	NO	NO	NO	Full head	NO	YES	YES	YES	heavy	YES	NO	NO	NO	NO	NO	NO	YES	NO	NO	NO	YES	NO	NO	YES	NO	aggravate	NO	YES	NO	YES	NO	YES	NO	NO	NO	drug	Less than 15 days
160	migraine	55	female	unemployed	158	50	years	Once in a few months	hours	NO	NO	NO	NO	NO	NO	One side	YES	NO	NO	NO	medium	YES	NO	NO	NO	NO	NO	NO	YES	YES	NO	NO	YES	NO	NO	NO	NO	unchanged	NO	YES	NO	NO	NO	YES	NO	NO	NO	drug	Less than 15 days
161	migraine	44	female	staff	160	80	years	Once in a few years	days	YES	NO	NO	NO	NO	NO	Both sides	YES	YES	YES	NO	medium	YES	NO	NO	NO	NO	YES	NO	NO	NO	NO	NO	YES	NO	NO	YES	NO	unchanged	NO	YES	NO	NO	NO	YES	NO	NO	NO	rest	Less than 15 days
162	tension-type headache	41	female	staff	154	47	years	Once in a few years	days	NO	NO	YES	NO	NO	NO	Both sides	YES	NO	YES	NO	medium	YES	NO	NO	NO	NO	YES	NO	NO	NO	NO	NO	NO	NO	NO	NO	NO	relieve	NO	YES	NO	NO	NO	YES	NO	YES	NO	drug	60-90 days
163	tension-type headache	60	female	unemployed	160	80	years	Once in a few months	days	NO	YES	NO	NO	NO	NO	Both sides	NO	YES	YES	NO	medium	YES	NO	NO	NO	NO	NO	NO	YES	NO	NO	NO	NO	NO	NO	NO	NO	unchanged	YES	NO	NO	NO	NO	NO	NO	NO	NO	drug	Less than 15 days
164	migraine	35	female	worker	160	59	months	Once in a few days	hours	NO	NO	NO	NO	NO	NO	Both sides	NO	YES	NO	NO	heavy	YES	NO	NO	NO	NO	NO	NO	YES	NO	NO	NO	YES	NO	NO	NO	NO	aggravate	YES	NO	NO	NO	NO	NO	NO	NO	NO	rest	Less than 15 days
165	migraine	50	female	unemployed	150	47	years	Once in a few weeks	days	NO	YES	NO	NO	NO	NO	Alternate front and back	YES	NO	NO	NO	heavy	YES	NO	NO	NO	NO	NO	NO	YES	YES	NO	NO	YES	NO	NO	NO	NO	relieve	NO	NO	NO	NO	NO	YES	NO	NO	NO	drug	15-30 days
166	tension-type headache	68	male	worker	172	75	months	Once in a few days	days	NO	NO	YES	NO	NO	NO	One side	NO	YES	NO	NO	light	YES	NO	NO	NO	NO	YES	NO	NO	NO	NO	NO	NO	NO	NO	YES	NO	unchanged	YES	NO	NO	NO	NO	NO	NO	NO	NO	rest	60-90 days
167	migraine	33	female	staff	165	60	years	Once in a few years	hours	NO	NO	NO	YES	NO	NO	Both sides	NO	NO	YES	NO	light	YES	NO	NO	NO	NO	YES	NO	NO	NO	NO	NO	NO	NO	NO	NO	NO	unchanged	NO	YES	NO	YES	NO	YES	NO	NO	NO	rest	Less than 15 days
168	tension-type headache	61	female	unemployed	160	64	months	Once in a few weeks	hours	NO	NO	YES	NO	NO	NO	Both sides	NO	YES	NO	NO	light	YES	NO	NO	NO	NO	NO	NO	YES	NO	NO	NO	YES	NO	NO	YES	NO	aggravate	NO	NO	NO	NO	NO	YES	NO	NO	NO	rest	60-90 days
169	migraine	31	male	student	184	69	years	Once in a few months	hours	NO	NO	NO	NO	NO	NO	Both sides	NO	YES	NO	NO	heavy	NO	YES	NO	NO	NO	NO	NO	YES	NO	NO	NO	NO	NO	NO	NO	NO	aggravate	YES	NO	NO	NO	NO	NO	NO	NO	NO	rest	Less than 15 days
170	migraine	29	female	staff	172	65	years	Once in a few years	days	NO	NO	NO	NO	NO	NO	One side	NO	NO	YES	NO	medium	YES	NO	NO	NO	NO	YES	NO	NO	NO	NO	NO	NO	NO	NO	NO	NO	aggravate	NO	NO	NO	YES	NO	NO	NO	NO	NO	rest	Less than 15 days
171	tension-type headache	80	male	unemployed	176	68	months	Once in a few days	minutes	NO	YES	NO	NO	NO	NO	Full head	YES	NO	NO	NO	medium	YES	NO	NO	NO	NO	YES	NO	NO	NO	NO	NO	NO	NO	NO	NO	NO	unchanged	YES	NO	NO	NO	NO	NO	NO	NO	NO	rest	30-60 days
172	migraine	42	male	staff	162	60	years	Once in a few months	days	NO	NO	YES	NO	NO	NO	One side	NO	NO	YES	YES	medium	YES	NO	NO	NO	NO	NO	NO	NO	YES	NO	NO	YES	NO	NO	NO	NO	aggravate	NO	YES	NO	YES	NO	YES	NO	YES	NO	drug	15-30 days
173	migraine	19	female	student	160	48	years	Once in a few weeks	hours	YES	YES	NO	NO	NO	NO	Both sides	NO	YES	NO	NO	heavy	YES	NO	NO	NO	NO	NO	NO	YES	YES	NO	NO	NO	NO	NO	NO	NO	aggravate	NO	YES	NO	NO	NO	YES	NO	NO	NO	drug	60-90 days
